# Supplementary material for: Cyclodextrin–Amphiphilic Copolymer Supramolecular Assemblies for the Ocular Delivery of Natamycin
Source: PubMed Central journal article supplement (PMC6566826; doi:10.3390/nano9050745), 2019-05-15
Supplement: nanomaterials-09-00745-s001.pdf [file nanomaterials-09-00745-s001.pdf]

## Supplementary Information

# Cyclodextrin–Amphiphilic Copolymer Supramolecular Assemblies for the Ocular Delivery of Natamycin

Blanca Lorenzo-Veiga <sup>1</sup>, Hakon Hrafn Sigurdsson <sup>1</sup>, Thorsteinn Loftsson <sup>1</sup> and Carmen Alvarez-Lorenzo <sup>2,\*</sup>

<sup>1</sup> Faculty of Pharmaceutical Sciences, University of Iceland, Hofsvallagata 53, IS-107 Reykjavik, Iceland; blv3@hi.is (B.L.-V.); hhs@hi.is (H.H.S.); thorstlo@hi.is (T.L.)

<sup>2</sup> Departamento de Farmacología, Farmacia y Tecnología Farmacéutica, R+D Pharma Group (GI-1645), Facultad de Farmacia and Health Research Institute of Santiago de Compostela (IDIS), Universidade de Santiago de Compostela, 15782 Santiago de Compostela, Spain

\* Correspondence: carmen.alvarez.lorenzo@usc.es; Tel.: +34-881-815-239

**Table S1.** Properties of non-loaded Soluplus and Pluronic P103 micelle dispersions in 0.9% NaCl at 25 °C (n.d.= non detectable).

| Polymer concentration (%w/v) | Soluplus |                    |               |                          | Pluronic P103 |                    |               |                          |
|------------------------------|----------|--------------------|---------------|--------------------------|---------------|--------------------|---------------|--------------------------|
|                              | pH       | Mean diameter (nm) | PDI           | Mean Zeta potential (mV) | pH            | Mean diameter (nm) | PDI           | Mean Zeta potential (mV) |
| 5                            | 3.45     | 73.66 ± 0.19       | 0.084 ± 0.004 | −0.02 ± 0.05             | 6.30          | 14.77 ± 0.11       | 0.140 ± 0.023 | −0.02 ± 0.05             |
| 4                            | 3.54     | 71.04 ± 1.10       | 0.079 ± 0.006 | −0.16 ± 0.08             | 6.33          | 15.47 ± 0.18       | 0.125 ± 0.019 | −0.16 ± 0.08             |
| 3                            | 3.60     | 69.41 ± 0.28       | 0.075 ± 0.005 | −0.11 ± 0.07             | 6.26          | 15.44 ± 0.03       | 0.069 ± 0.016 | −0.11 ± 0.07             |
| 2                            | 3.69     | 67.55 ± 0.57       | 0.055 ± 0.012 | −0.16 ± 0.19             | 6.25          | 17.21 ± 0.70       | 0.185 ± 0.016 | −0.16 ± 0.19             |
| 1                            | 3.89     | 69.27 ± 1.45       | 0.106 ± 0.034 | −0.18 ± 0.08             | 6.24          | 23.81 ± 1.52       | 0.224 ± 0.027 | −0.18 ± 0.08             |
| 0.1                          | 4.86     | 68.04 ± 1.57       | 0.184 ± 0.066 | −0.25 ± 0.04             | 5.70          | n.d.               | n.d.          | −0.25 ± 0.04             |
| 0.01                         | 5.20     | 70.00 ± 0.99       | 0.130 ± 0.034 | −0.03 ± 0.18             | 5.57          | n.d.               | n.d.          | −0.03 ± 0.18             |

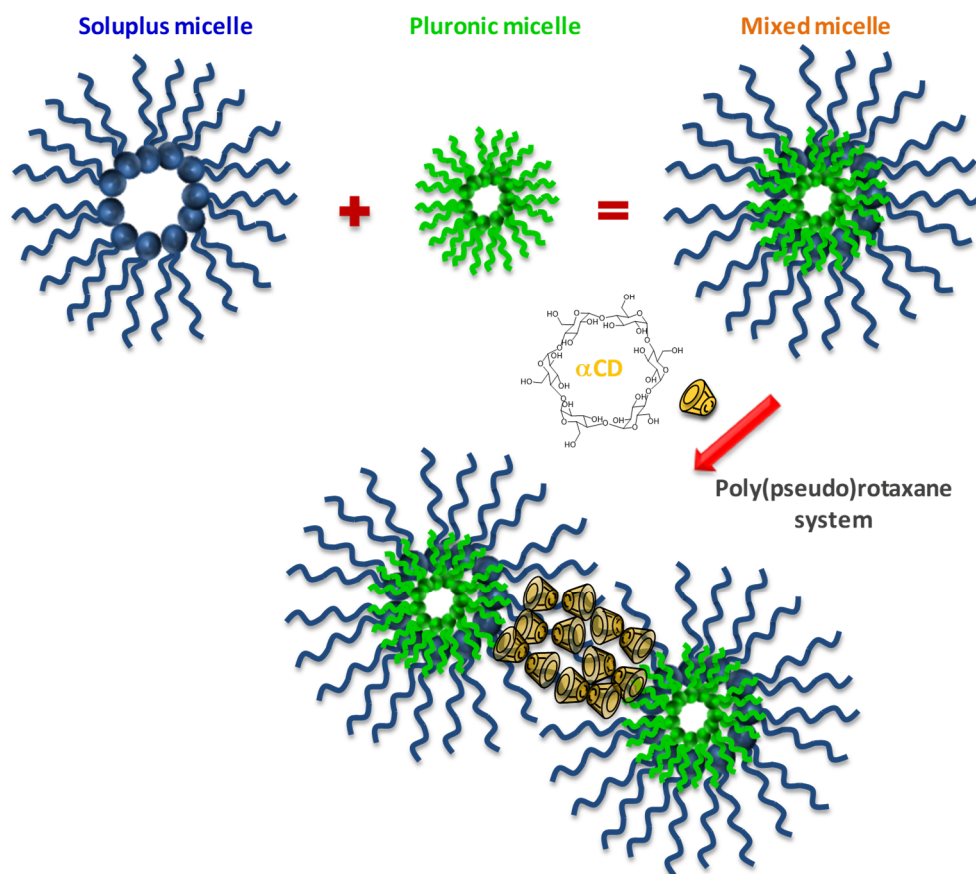

**Figure S1.** Structure of single and mixed nanomicelles formed by self-assembly of the amphiphilic block copolymers, and of the CD-based poly(pseudo)rotaxanes.

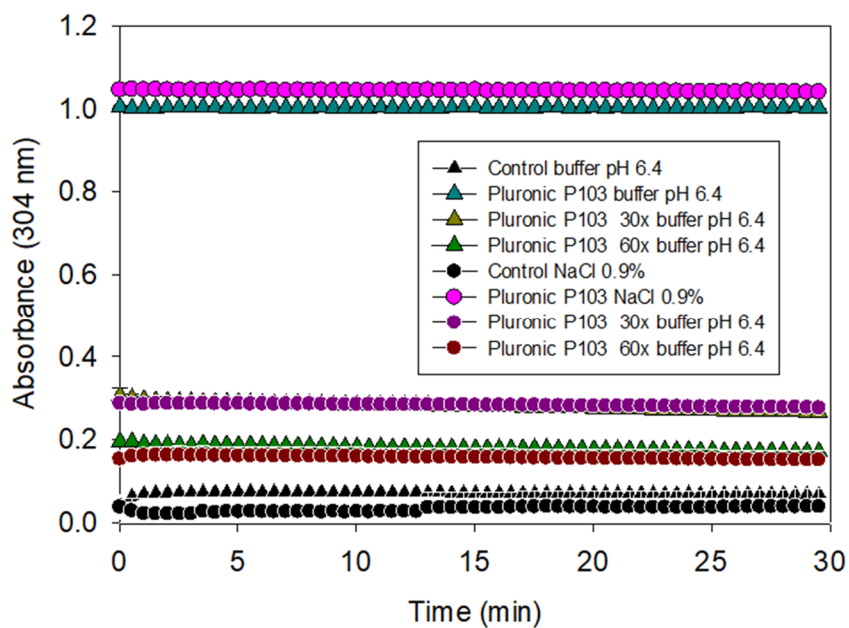

**Figure S2.** Evolution of the absorbance of natamycin-loaded Pluronic P103 (10%) nanomicelle formulations before (the signal was saturated) and after 30-fold and 60-fold dilution, respectively, in 0.9% NaCl or pH 6.4 buffer. Controls refer to unloaded Pluronic P103 (10%) nanomicelles. Error bars refer to the standard deviations ( $n = 3$ ).

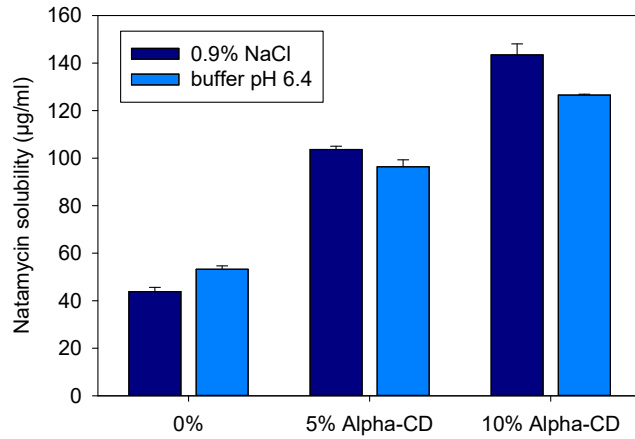

**Figure S3.** The apparent solubility of natamycin without  $\alpha$ CD and containing 5–10% (*w/v*) in 0.9% NaCl and pH 6.4 buffer at 25 °C.

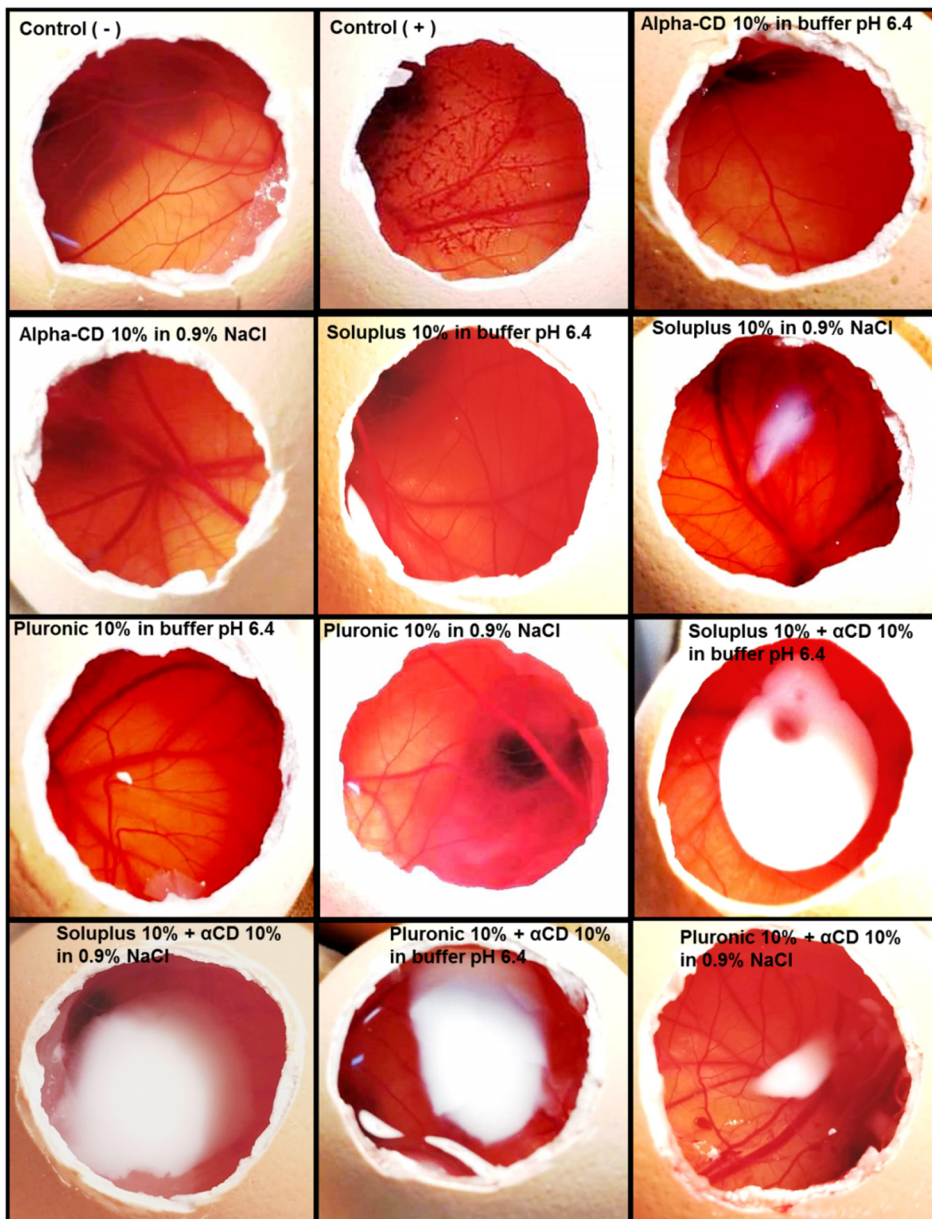

**Figure S4.** Pictures of Hen's Egg Test on the Chorioallantoic Membrane (HET-CAM) tests of Soluplus and Pluronic P103 formulations. Negative and positive controls refer to 0.9% NaCl and 0.1 N NaOH, respectively.
